# Supplementary material for: Study of microstructure formation in epoxy based systems using small angle neutron scattering
Source: Royal Society of Chemistry journal article supplement (doi:10.1039/d5ra05789b), 2025-01-01
Supplement: d5ra05789b1.pdf [file d5ra05789b1.pdf]

## Supplementary Information

### Microstructure formation in epoxy-based systems studied using Small Angle Neutron Scattering

Natasha Shirshova,<sup>\*a</sup> Leide Cavalcanti,<sup>b</sup> Sarah Youngs,<sup>b</sup> and Valeria Arrighi<sup>c</sup>

<sup>a</sup> Department of Engineering, Durham University, South Road, Durham, DH1 3LE, United Kingdom

<sup>b</sup> Science Technology Facilities Council; Isis Neutron and Muon Source; Harwell Campus; Oxfordshire; OX11 0QX, United Kingdom

<sup>c</sup> Institute of Chemical Sciences, School of Engineering & Physical Sciences, Heriot-Watt University, Edinburgh, EH14 4AS, United Kingdom

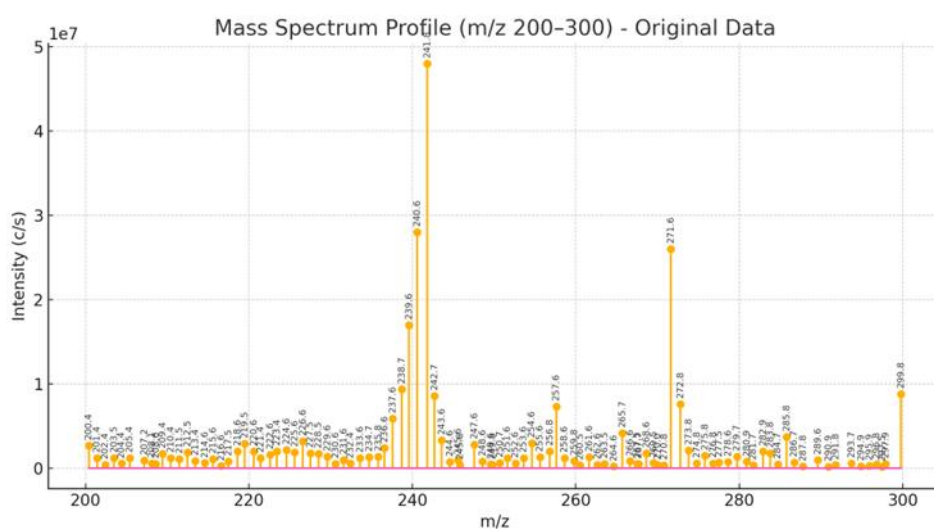

Figure S1. Mass Spectrum Profile (m/z 200–300) of the deuterated IL with Peak Labels.

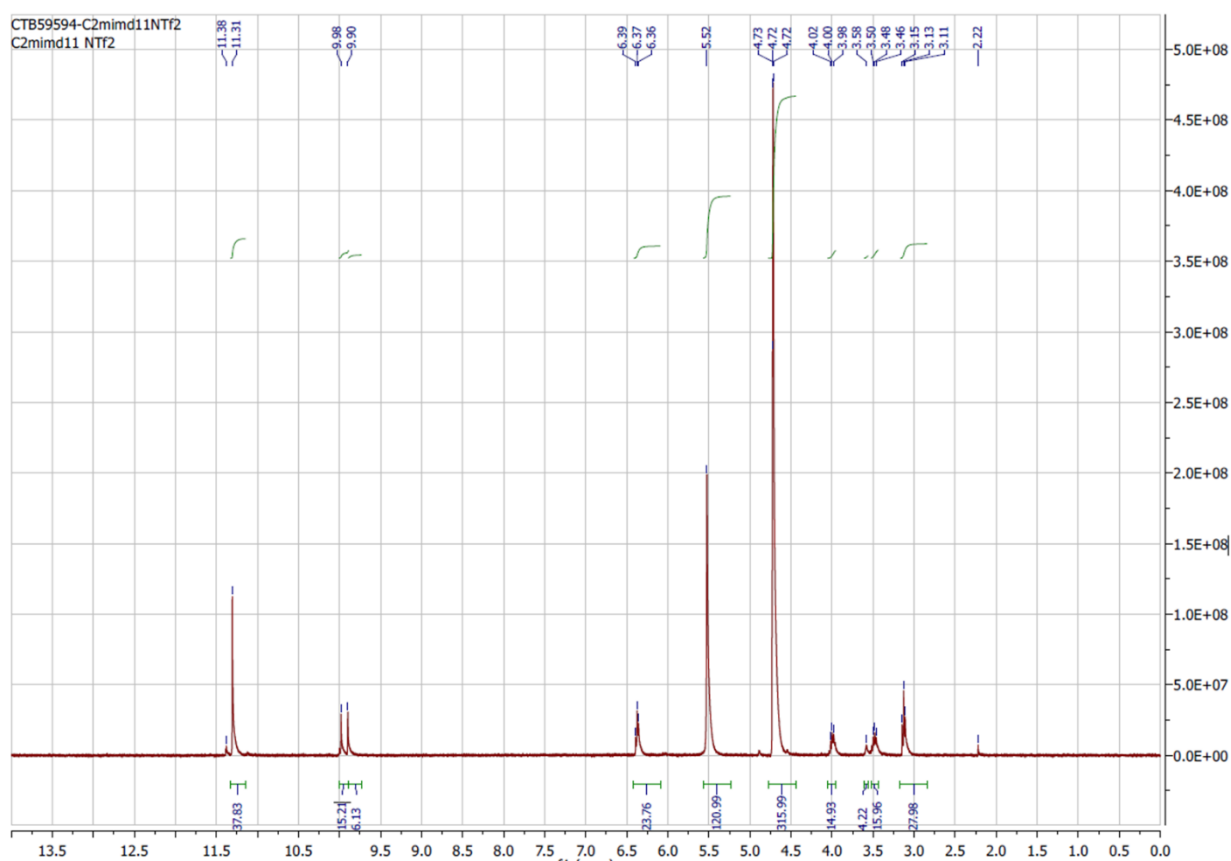

Fig S2.  $^1\text{H}$  NMR spectra of the d-IL in d-DMSO.

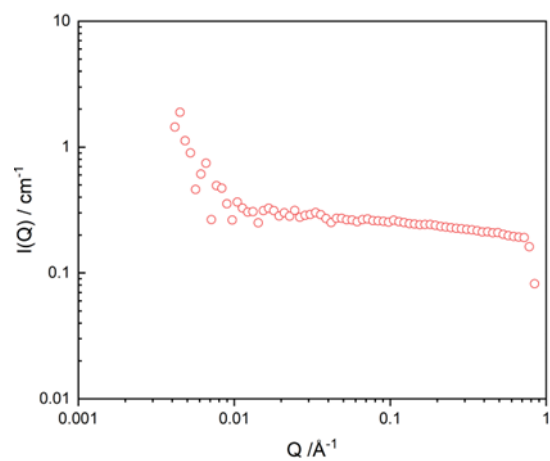

Figure S3. SANS curves for a block copolymer solution in h-IL.

Table S1. SDL values for compounds used

| Chemicals | Formula                                                           | SDL/ $\text{\AA}^{-2} \times 10^6$ |
|-----------|-------------------------------------------------------------------|------------------------------------|
| DGEBA     | $\text{C}_{21}\text{H}_{24}\text{O}_4$                            | 1.29                               |
| iPDA      | $\text{C}_{10}\text{H}_{22}\text{N}_4$                            | 0.657                              |
| IL        | $\text{C}_8\text{H}_{11}\text{O}_4\text{N}_3\text{F}_6\text{S}_2$ | 2.38                               |
| d-IL      | $\text{C}_8\text{D}_{11}\text{O}_4\text{N}_3\text{F}_6\text{S}_2$ | 4.88                               |

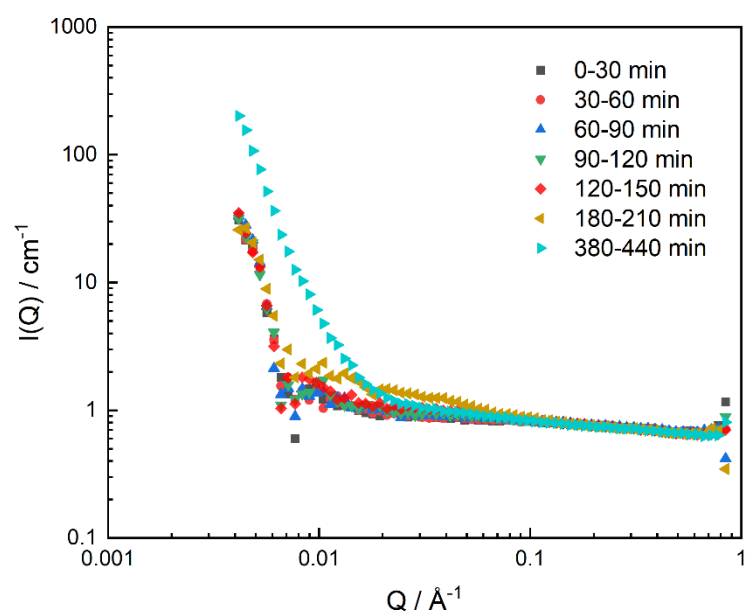

Figure S4. SANS data for EPhIL as a function of curing time. The sample consists of epoxy, iPDA in a h-IL. EP:iPDA = 4:1 wt./wt.; [IL]= 40 vol%.
